# Supplementary material for: A bidirectionally conductive composite membrane based on copper-coated electrospun PI-CNT fibers as a current collector for lithium-ion batteries
Source: Royal Society of Chemistry journal article supplement (doi:10.1039/d5ra10075e), 2026-01-01
Supplement: d5ra10075e1.pdf [file d5ra10075e1.pdf]

## Supplementary Information

For

A bidirectionally conductive composite membrane based  
on copper-coated electrospun PI-CNT fibers as current  
collector for lithium-ion batteries

Jianghui Liu <sup>a</sup>, Shuya Liu <sup>b</sup>, Lili Zhao <sup>a</sup>, Yujun Luo <sup>a</sup>, Yini Ran <sup>a</sup>, Mohan  
Tang <sup>a</sup>, Guilin Shi <sup>a</sup>, Yuxin Liu <sup>a</sup>, Jianglan Lin <sup>a</sup>, Maoxian Wang <sup>a</sup>,  
Zhengnan Li <sup>a</sup>, Zhen Yao <sup>a</sup>, Zhusheng Yang <sup>a</sup>, Hai Fu <sup>a,\*</sup>

<sup>a</sup> *School of Materials and Architecture Engineering (Guizhou School of  
Emergency Management), Guizhou Normal University, Guizhou 550025,  
China*

<sup>b</sup> *School of Chemical Engineering and Technology, Tianjin University,  
Tianjin 300350, China*

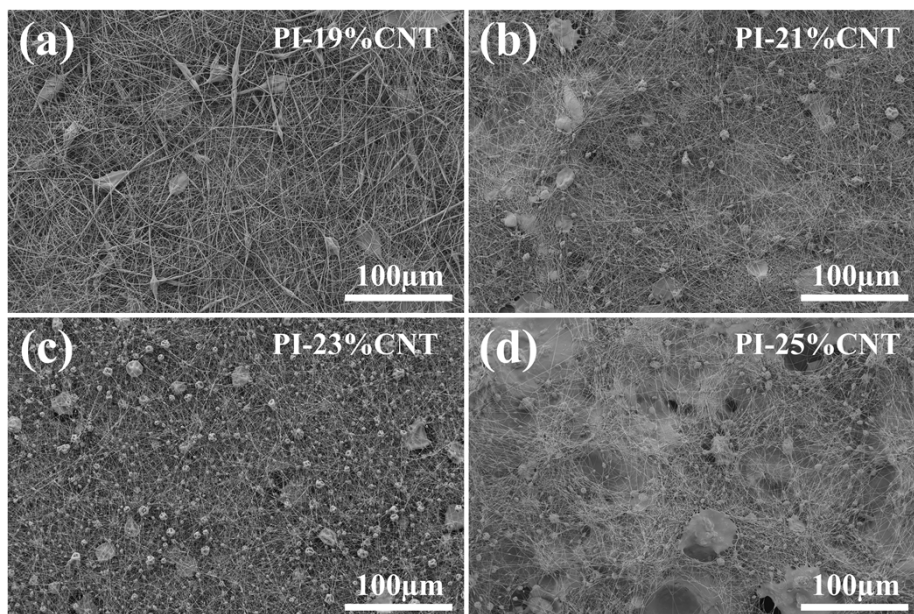

Figure S1. SEM images of (a) PI-19%CNT, (b) PI-21%CNT, (c) PI-23%CNT, and (d) PI-25%CNT membranes.

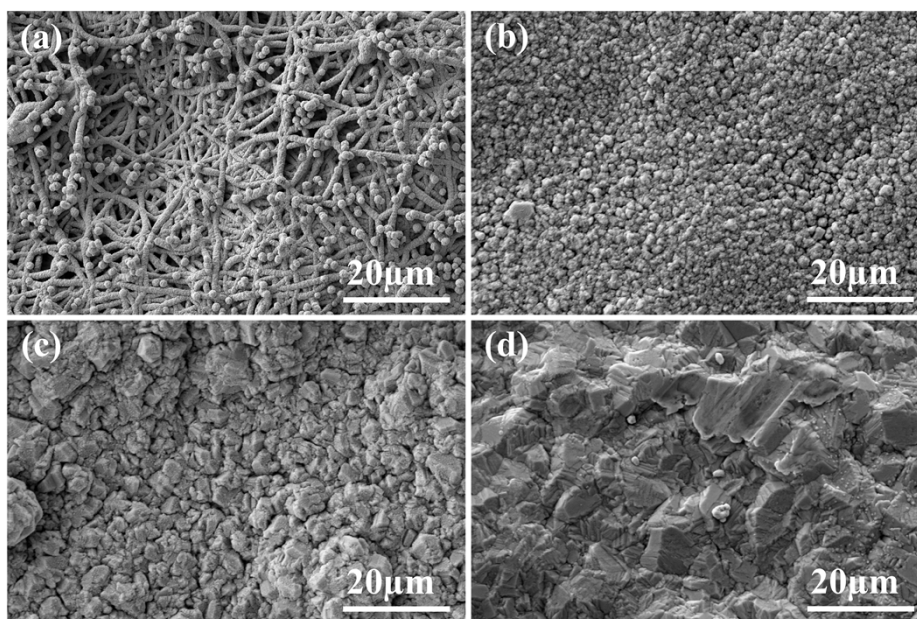

Figure S2. SEM images of PI-17%CNT membranes subjected to electroless copper deposition for (a) 45 min, (b) 90 min, (c) 135 min, and (d) 180 min, respectively.

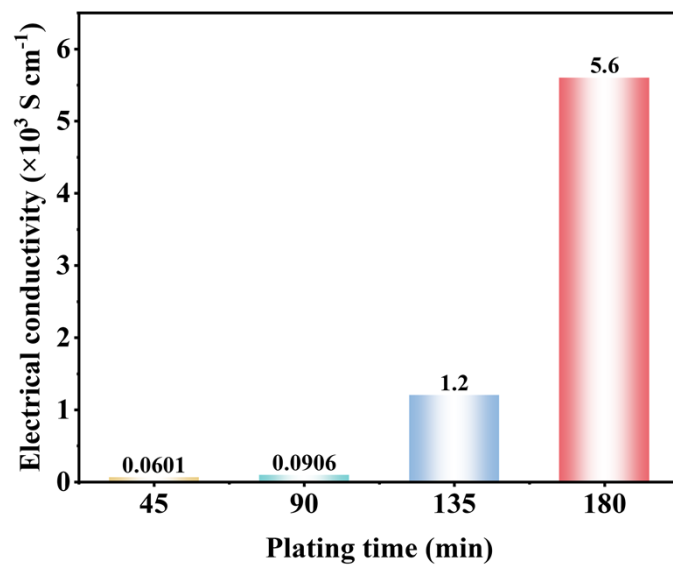

Figure S3. Electrical conductivity of the PI-17% CNT composite membrane at copper plating times of 45 min, 90 min, 135 min, and 180 min.

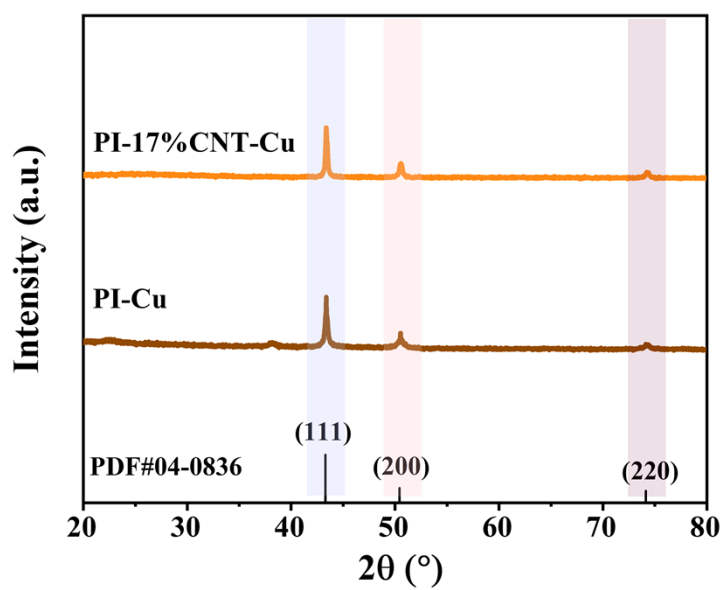

Figure S4. XRD patterns of PI-Cu and PI-17% CNT-Cu CCs.

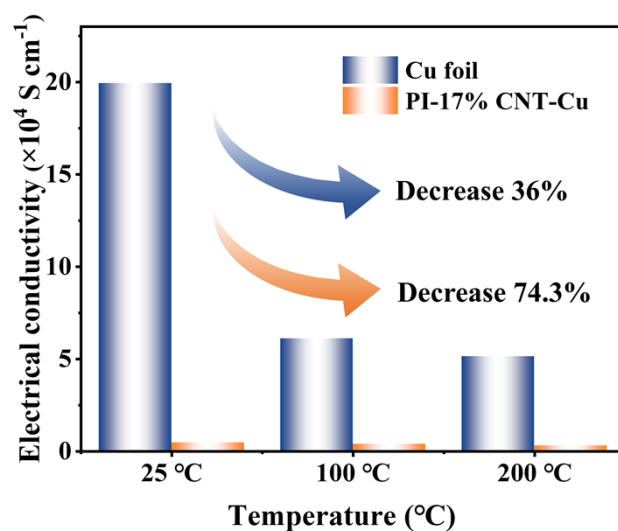

Figure S5. Changes in the electrical conductivity of Cu foil and PI-CNT-Cu CCs under varying temperatures.

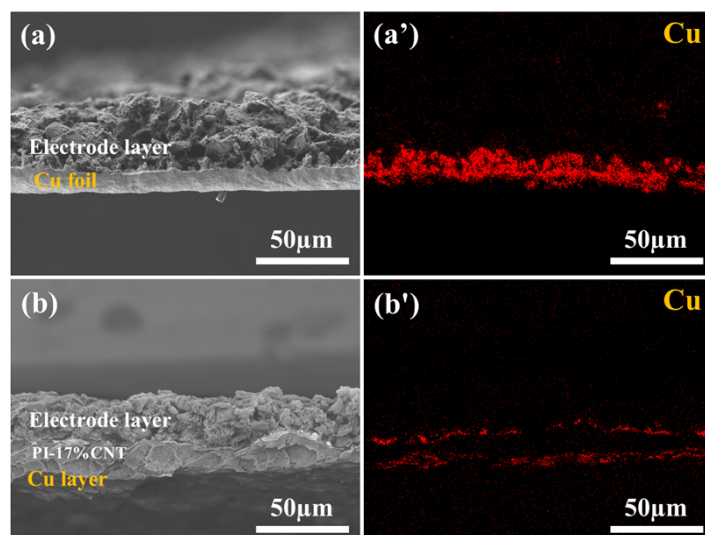

Figure S6. Cross-sectional SEM images of pristine electrodes on (a) Cu foil and (b) PI-17%CNT-Cu, accompanied by their corresponding Cu elemental mappings from EDS analysis (a') and (b').

Table S1. Fitted values of  $R_b$ ,  $R_{SEI}$ , and  $R_{ct}$  for cells assembled with different CCs after the 1st and 200th cycles.

| Sample                | Cycle number | $R_b$ ( $\Omega$ ) | $R_{SEI}$ ( $\Omega$ ) | $R_{ct}$ ( $\Omega$ ) |
|-----------------------|--------------|--------------------|------------------------|-----------------------|
| Cu foil/Graphite      | 1st          | 3.4                | 9.7                    | 55.0                  |
| PI-10%CNT-Cu/Graphite |              | 2.1                | 8.7                    | 36.9                  |
| PI-15%CNT-Cu/Graphite |              | 1.9                | 5.6                    | 36.4                  |
| PI-17%CNT-Cu/Graphite |              | 1.8                | 5.0                    | 33.5                  |
| Cu foil/Graphite      | 200th        | 2.7                | 14.7                   | 181                   |
| PI-10%CNT-Cu/Graphite |              | 2.6                | 11.1                   | 141                   |
| PI-15%CNT-Cu/Graphite |              | 1.9                | 6.2                    | 106                   |
| PI-17%CNT-Cu/Graphite |              | 1.6                | 4.9                    | 76                    |
